# Supplementary material for: Autophagy downregulates NLRP3-dependent inflammatory response of intestinal epithelial cells under nutrient deprivation
Source: PubMed Central journal article supplement — BMB Rep. 2021 May 31;54(5):260–5. doi: 10.5483/BMBRep.2021.54.5.211 (PMC8167250; doi:10.5483/bmbrep.2021.54.5.211), 2021-05-31
Supplement: bmb-54-5-260-supple.pdf [file bmb-54-5-260-supple.pdf]

# Supplementary information

**Autophagy down-regulates NLRP3-dependent inflammatory response of  
intestinal epithelial cells under nutrient deprivation**

Yewon Yun, Ahruem Baek, and Dong-Eun Kim\*

Department of Bioscience and Biotechnology, Konkuk University, Neundong-ro  
120, Gwangjin-gu, Seoul 05029, Republic of Korea

\*Correspondence: Tel : +82-2-2049-6062; E-mail: kimde@konkuk.ac.kr

## Supplementary Figure 1

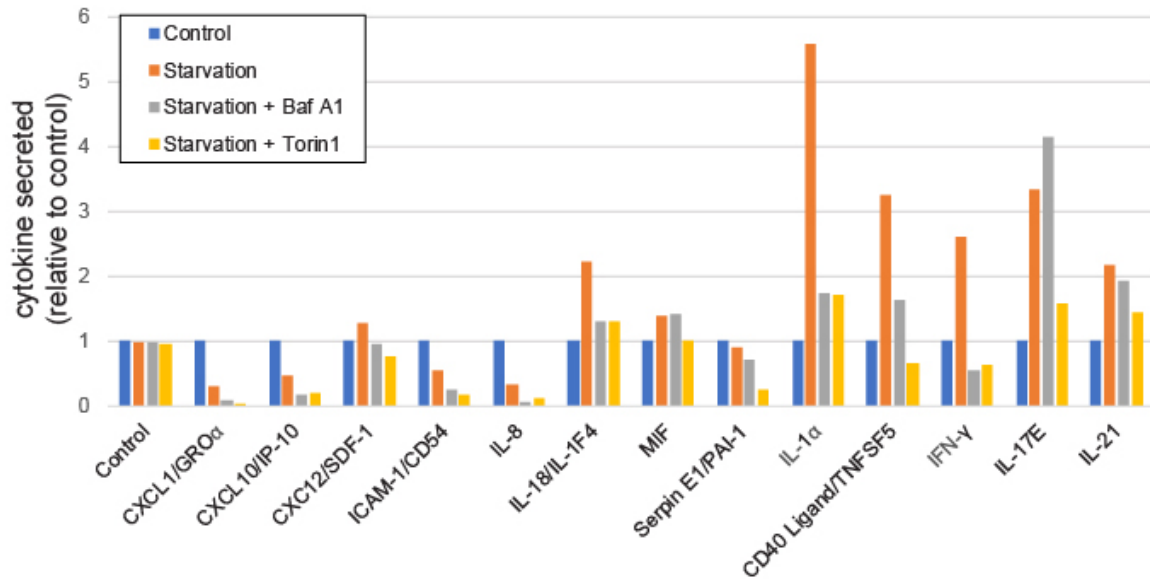

**Fig. S1** Cytokine production was induced under nutrient deprivation in Caco-2 cells. Cells were treated with bafilomycin A1 (20 nM) and torin 1 (2  $\mu$ M), respectively, under nutrient deprivation at 36 h. Bar graph indicates the levels of cytokine that were normalized to the control.
